# Supplementary material for: Upregulation of FLG, LOR, and IVL Expression by Rhodiola crenulata Root Extract via Aryl Hydrocarbon Receptor: Differential Involvement of OVOL1
Source: PubMed Central journal article supplement (PMC6032276; doi:10.3390/ijms19061654), 2018-06-04
Supplement: ijms-19-01654-s001.pdf [file ijms-19-01654-s001.pdf]

# Supplementary Materials: Upregulation of FLG, LOR, and IVL Expression by *Rhodiola crenulata* Root Extract via Aryl Hydrocarbon Receptor: Differential Involvement of OVOL1

Akiko Hashimoto-Hachiya, Gaku Tsuji, Mika Murai, Xianghong Yan and Masutaka Furue

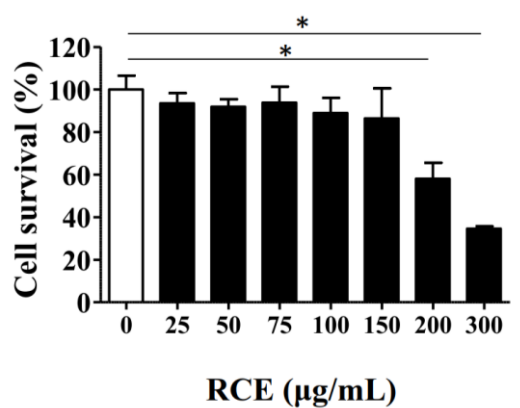

**Figure S1.** Cell viability analysis of normal human epidermal keratinocytes (NHEKs) is performed using a WST-1 assay (Takara Bio). NHEKs are treated with various concentrations of RCE (0, 25, 50, 75, 100, 150, 200, and 300 mg/mL) for 24 h. The formazan dye produced by viable cells is quantified by measuring the absorbance at  $\lambda = 450$  nm. Data are shown in mean  $\pm$  SEM. \*:  $p < 0.05$  ( $n = 3$  for each group).

**Table S1.** Primers for qRT-PCR.

| Gene           | Forward Primer                | Reverse Primer                |
|----------------|-------------------------------|-------------------------------|
| OVOL1          | 5'-ACGATGCCCATCCACTACCTG-3'   | 5'-TTTCTGAGGTGCTGGTCATCATT-3' |
| FLG            | 5'-CATGGCAGCTATGGTAGTGCAGA-3' | 5'-ACCAAACGCACTTGCTTTACAGA-3' |
| LOR            | 5'-GAGTTGGAGGTGTTTTCCAGGG-3'  | 5'-GCAGAACTAGATGCAGCCGGA-3'   |
| IVL            | 5'-TAACCACCCGCAGTGTCCAG-3'    | 5'-ACAGATGAGACGGGCCACCTA-3'   |
| CYP1A1         | PPH01271E (SABiosciences)     |                               |
| $\beta$ -actin | 5'-ATTGCCGACAGGATGCAGA-3'     | 5'-GAGTACTTGCGCTCAGGAGGA-3'   |
